# Supplementary material
Source: ML conference proceedings conference paper supplement (https://proceedings.mlr.press/v84/arbel18a.html)
Supplement: Supplementary file 1 [file arbel18a-supp.pdf]

## Appendices

In this section we prove Theorem 1 and Theorem 2.

### A Preliminaries

#### A.1 Notation

We first introduce some relevant concepts from functional analysis. If  $E$  is Hilbert space we denote by  $\langle \cdot, \cdot \rangle_E$  and  $\|\cdot\|_E$  its corresponding inner product and norm, respectively. If  $E$  and  $F$  are two Hilbert spaces, we use  $\|\cdot\|$  to denote the operator norm  $\|A\| = \sup_{f: \|f\| \leq 1} \|Af\|$ , where  $A$  is an operator from  $E$  to  $F$ . We denote by  $A^*$  the adjoint of  $A$ .

If  $E$  is separable with an orthonormal basis  $\{e_k\}_k$ , then  $\|\cdot\|_1$  and  $\|\cdot\|_2$  are the trace norm and Hilbert-Schmidt norm on  $E$  and are given by:

$$\begin{aligned} \|A\|_1 &= \sum_k \langle (A^*A)^{\frac{1}{2}} e_k, e_k \rangle \\ \|A\|_2 &= \|A^*A\|_1. \end{aligned}$$

where  $A$  is an operator from  $E$  to  $E$ .  $\lambda_{max}(A)$  is used to denote the algebraically largest eigenvalue of  $A$ . For  $f$  in  $E$  and  $g$  in  $F$  we denote by  $g \otimes f$  the tensor product viewed as an application from  $E$  to  $F$  with  $(g \otimes f)h = g(f, h)_E$  for all  $h$  in  $E$ .  $C^1(\Omega)$  denotes the space of continuously differentiable functions on  $\Omega$  and  $L^r(\Omega)$  the space of  $r$ -power Lebesgues-integrable function. Finally for any vector  $\beta$  in  $\mathbb{R}^{nd}$ , we use the notation  $\beta_{(a,i)} = \beta_{(a-1)d+i}$  for  $a \in [n]$  and  $i \in [d]$ .

#### A.2 Operator valued kernels and feature map derivatives

Let  $\mathcal{X}$  and  $\mathcal{Y}$  be two open subsets of  $\mathbb{R}^p$  and  $\mathbb{R}^d$ .  $\mathcal{H}_\mathcal{Y}$  is a reproducing kernel Hilbert space of functions  $f: \mathcal{Y} \rightarrow \mathbb{R}$  with kernel  $k_\mathcal{Y}$ . We denote by  $\mathcal{H}$  a vector-valued reproducing kernel Hilbert space of functions  $T: x \mapsto T_x$  from  $\mathcal{X}$  to  $\mathcal{H}_\mathcal{Y}$  and we introduce the feature operator  $\Gamma: x \mapsto \Gamma_x$  from  $\mathcal{X}$  to  $\mathcal{L}(\mathcal{H}_\mathcal{Y}, \mathcal{H})$  where  $\mathcal{L}(\mathcal{H}_\mathcal{Y}, \mathcal{H})$  is the set of bounded operators from  $\mathcal{H}_\mathcal{Y}$  to  $\mathcal{H}$ . For every  $x \in \mathcal{X}$ ,  $\Gamma_x$  is an operator defined from  $\mathcal{H}_\mathcal{Y}$  to  $\mathcal{H}$ .

The following reproducing properties will be used extensively:

- Reproducing property of the derivatives of a function in  $\mathcal{H}_\mathcal{Y}$  (Steinwart et al., 2008, Lemma 4.34): provided that the kernel  $k_\mathcal{Y}$  is differentiable  $m$ -times with respect to each coordinate, then all  $f \in \mathcal{H}_\mathcal{Y}$  are differentiable for every multi-index  $\alpha \in \mathbb{N}_0^d$  such that  $\alpha \leq m$ , and

$$\partial^\alpha f(y) = \langle f, \partial^\alpha k(y, \cdot) \rangle_{\mathcal{H}_\mathcal{Y}} \quad \forall y \in \mathcal{Y},$$

where  $\partial^\alpha k_\mathcal{Y}(y, y') = \frac{\partial^\alpha k_\mathcal{Y}(y, y')}{\partial^\alpha y}$ . In particular we will use the notation

$$\partial_i k(y, y') = \frac{\partial k(y, y')}{\partial y_i}, \quad \partial_{i+d} k(y, y') = \frac{\partial k(y, y')}{\partial y'_i}.$$

- Reproducing property in the vector-valued space  $\mathcal{H}$ : For any  $f \in \mathcal{H}_\mathcal{Y}$  and any  $T \in \mathcal{H}$  we have the following:

$$\langle T_x, f \rangle_{\mathcal{H}_\mathcal{Y}} = \langle T, \Gamma_x f \rangle_{\mathcal{H}}$$

In particular for every  $y \in \mathcal{Y}$  we get:

$$\langle T_x, k(y, \cdot) \rangle_{\mathcal{H}_\mathcal{Y}} = \langle T, \Gamma_x k(y, \cdot) \rangle_{\mathcal{H}}$$

Using now the reproducing property in  $\mathcal{H}_\mathcal{Y}$  we get:

$$T(x, y) := T_x(y) = \langle T, \Gamma_x k(y, \cdot) \rangle_{\mathcal{H}}$$

### A.3 The conditional infinite dimensional exponential family

Let  $q_0$  be a base density function of a probability distribution over  $\mathcal{Y}$  and  $\pi$  a probability distribution over  $\mathcal{X}$ .  $\pi$  and  $q_0$  are fixed and are assumed to be supported in the whole spaces  $\mathcal{X}$  and  $\mathcal{Y}$ , respectively.

We introduce the following functions  $Z : \mathcal{H}_{\mathcal{Y}} \rightarrow \mathbb{R}_+^*$ , such that for every  $f \in \mathcal{H}_{\mathcal{Y}}$  we have

$$Z(f) := \int_{\mathcal{Y}} \exp(\langle f, k(y, \cdot) \rangle_{\mathcal{H}_{\mathcal{Y}}}) q_0(dy).$$

We consider now the following family of operators

$$\mathcal{T} = \{T \in \mathcal{H} : Z(T_x) < \infty, \forall x \in \mathcal{X}\}.$$

This allows to introduce the Kernel Conditional Exponential Family as the family of conditional distributions satisfying

$$\mathcal{P} = \left\{ p_T(x|y) = q_0(y) \frac{e^{\langle T, \Gamma_x k(y, \cdot) \rangle_{\mathcal{H}}}}{Z(T_x)} \mid T \in \mathcal{T} \right\}.$$

Given samples  $(X_i, Y_i)_{i=1}^n \in \mathcal{X} \times \mathcal{Y}$  following a joint distribution  $p_0$  the goal is to approximate the conditional density function  $p_0(y|x)$  in the case where  $p_0(y|x) \in \mathcal{P}$  (i.e.  $\exists T_0 \in \mathcal{T}$  such that  $p_0(y|x) = p_{T_0}(y|x)$ ). To this end, we introduce the expected conditional score function between two conditional distributions  $p(\cdot|x)$  and  $q(\cdot|x)$  under  $\pi$ ,

$$J(p||q) = \frac{1}{2} \int_{\mathcal{X}} \int_{\mathcal{Y}} \sum_{i=1}^d [\partial_i \log p(y|x) - \partial_i \log q(y|x)]^2 p(dy|x) \pi(dx).$$

This function has the nice property that  $J(p||q) \geq 0$  and that  $J(p||q) = 0 \Leftrightarrow q = p$ , which makes it a good candidate as a loss function.

The marginal distribution  $p_0(x)$  doesn't have to match  $\pi(x)$  in general as long as they have the same support. For purpose of simplicity we will assume that  $p_0(x) = \pi(x)$ .

### A.4 Assumptions

We make the following assumptions:

- (A) (well specified) The true conditional density  $p_0(y|x) = p_{T_0}(y|x) \in \mathcal{P}$  for some  $T_0$  in  $\mathcal{T}$ .
- (B)  $\mathcal{Y}$  is a non-empty open subset of of the form  $\mathbb{R}^d$  with a piecewise smooth boundary  $\partial\mathcal{Y} := \overline{\mathcal{Y}} \setminus \mathcal{Y}$ , where  $\overline{\mathcal{Y}}$  denotes the closure of  $\mathcal{Y}$ .
- (C)  $k_{\mathcal{Y}}$  is twice continuously differentiable on  $\mathcal{Y} \times \mathcal{Y}$  and  $\partial^{\alpha, \alpha} k_{\mathcal{Y}}$  is continuously extensible to  $\overline{\mathcal{Y}} \times \overline{\mathcal{Y}}$  for all  $|\alpha| \leq 2$ .
- (D) For all  $x \in \mathcal{X}$  and all  $i \in [d]$ , as  $y$  approaches  $\partial\mathcal{Y} : \|\partial_i k(y, \cdot)\|_{\mathcal{Y}} p_0(y|x) = o(\|y\|^{1-d})$
- (E) The operator  $\Gamma$  is uniformly bounded for the operator norm  $\|\Gamma_x\|_{O_p} \leq \kappa$  for all  $x \in \mathcal{X}$ .
- (F) (Integrability) for some  $\epsilon \geq 1$  and all  $i \in [d]$ :

$$\|\partial_i k(y, \cdot)\|_{\mathcal{Y}} \in L^{2\epsilon}(\mathcal{Y}, p_0), \|\partial_i^2 k(y, \cdot)\|_{\mathcal{Y}} \in L^{\epsilon}(\mathcal{Y}, p_0), \|\partial_i k(y, \cdot)\|_{\mathcal{Y}} \partial_i \log q_0(y) \in L^{\epsilon}(\mathcal{Y}, p_0).$$

## B Theorems

In this section, we prove the main theorems of the document, by extending the proofs of Sriperumbudur et al., 2017 to the case of the vector-valued RKHS. We provide complete steps for all the proofs, including those that carry over from the earlier work, to make the presentation self-contained; the reader may compare with (Sriperumbudur et al., 2017, Section 8) to see the changes needed in the conditional setting.

### B.1 Score Matching

**Theorem 3 (Score Matching).** *Under Assumptions (A) to (F), the following holds:*

1.  $J(p_{T_0} || p_T) < +\infty$  for all  $T \in \mathcal{T}$
2. For all  $T \in \mathcal{H}$  define

$$J(T) = \frac{1}{2} \langle T - T_0, C(T - T_0) \rangle_{\mathcal{H}}, \quad (6)$$

where

$$C := \int_{\mathcal{X} \times \mathcal{Y}} \underbrace{\sum_{i=1}^d [\Gamma_x \partial_i k(y, \cdot) \otimes \Gamma_x \partial_i k(y, \cdot)]}_{C_{x,y}} p_0(dx, dy) = \mathbb{E}_{p_0}[C_{X,Y}]. \quad (7)$$

then  $C$  a trace-class positive operator on  $\mathcal{H}$  and for all  $T \in \mathcal{T}$   $J(T) = J(p_{T_0} || P_T)$ .

3. Alternatively,

$$J(T) = \frac{1}{2} \langle T, CT \rangle_{\mathcal{H}} + \langle T, \xi \rangle_{\mathcal{H}} + J(p_{T_0} || q_0).$$

where

$$\mathcal{H} \ni \xi := \int_{\mathcal{X} \times \mathcal{Y}} \underbrace{\sum_{i=1}^d \Gamma_x [\partial_i \log q_0(y) \partial_i k(y, \cdot) + \partial_i^2 k(y, \cdot)]}_{\xi_{x,y}} p_0(dx, dy) = \mathbb{E}_{p_0}[\xi_{X,Y}]$$

Moreover,  $T_0$  satisfies  $CT_0 = -\xi$

4. For any  $\lambda > 0$ , a unique minimizer  $T_\lambda$  of  $J_\lambda(T) := J(T) + \frac{\lambda}{2} \|T\|_{\mathcal{H}}^2$  over  $\mathcal{H}$  exists and is given by:

$$T_\lambda = -(C + \lambda I)^{-1} \xi = (C + \lambda I)^{-1} CT_0.$$

*Proof.* We prove the results in the same order as stated in the theorem:

1. By the reproducing property of the real valued space  $\mathcal{H}_y$  we have:  $T(x, y) = \langle T_x, k(y, \cdot) \rangle_{\mathcal{H}_y}$ . Using the reproducing property for the derivatives of real valued functions in an RKHS in Lemma 3, we get

$$\partial_i T(x, y) = \partial_i \langle T_x, k(y, \cdot) \rangle_{\mathcal{H}_y} = \langle T_x, \partial_i k(y, \cdot) \rangle_{\mathcal{H}_y} \quad \forall i \in [d].$$

Finally, using the reproducing property in the vector-valued space  $\mathcal{H}$ ,

$$\partial_i T(x, y) = \langle T, \Gamma_x \partial_i k(y, \cdot) \rangle_{\mathcal{H}}, \quad \forall i \in [d].$$

it is easy to see that

$$J(p_{T_0} || p_T) = \frac{1}{2} \int_{\mathcal{X} \times \mathcal{Y}} \sum_{i=1}^d \langle T_0 - T, \Gamma_x \partial_i k(y, \cdot) \rangle_{\mathcal{H}}^2 p_0(dx, dy). \quad (8)$$

By Assumptions (E) and (F),

$$\|\Gamma_x \partial_i k(y, \cdot)\|_{\mathcal{H}} \leq \|\Gamma_x\|_{op} \|\partial_i k(y, \cdot)\|_{\mathcal{H}_y} \leq \kappa \sqrt{\partial_i \partial_{i+d} k(y, y)} \in L^2(p_0),$$

and therefore by Cauchy-Schwarz inequality,

$$J(T) = J(p_{T_0} || p_T) \leq \frac{1}{2} \|T_0 - T\|_{\mathcal{H}}^2 \int_{\mathcal{X} \times \mathcal{Y}} \sum_{i=1}^d \|\Gamma_x \partial_i k(y, \cdot)\|_{\mathcal{H}}^2 p_0(dx, dy) < +\infty.$$

which means that  $J(T) < \infty$  for all  $T \in \mathcal{T}$ .

2. Starting from (8), it is easy to see that:

$$\begin{aligned} J(T) &= \frac{1}{2} \int_{\mathcal{X} \times \mathcal{Y}} \sum_{i=1}^d \langle T_0 - T, \Gamma_x \partial_i k(y, \cdot) \otimes \Gamma_x \partial_i k(y, \cdot) (T_0 - T) \rangle_{\mathcal{H}} p_0(dx, dy) \\ &= \frac{1}{2} \int_{\mathcal{X} \times \mathcal{Y}} \langle T_0 - T, C_{x,y}(T_0 - T) \rangle_{\mathcal{H}} p_0(dx, dy) \end{aligned}$$

In the first line, we used the fact that  $\langle a, b \rangle_{\mathcal{H}}^2 = \langle a, b \rangle_{\mathcal{H}} \langle a, b \rangle_{\mathcal{H}} = \langle a, b \otimes ba \rangle_{\mathcal{H}}$  for any  $a$  and  $b$  in a Hilbert space  $\mathcal{H}$ . By further observing that  $C_{x,y}$  and  $(T_0 - T) \otimes (T_0 - T)$  are Hilbert-Schmidt operators as  $\|C_{x,y}\|_{HS} \leq \kappa^2 \sum_{i=1}^d \|\partial_i k(y, \cdot)\| < \infty$  by Lemma 1 and  $\|(T_0 - T) \otimes (T_0 - T)\|_{HS} = \|(T_0 - T)\|_{\mathcal{H}}^2 < \infty$  we get that:

$$J(T) = \frac{1}{2} \int_{\mathcal{X} \times \mathcal{Y}} \langle (T_0 - T) \otimes (T_0 - T), C_{x,y} \rangle_{HS} p_0(dx, dy)$$

Using Assumption (F) we have by Lemma 2 that  $C_{x,y}$  is  $p_0$ -integrable in the Bochner sense (see Retherford, 1978) Definition 1) and that the inner product and integration may be interchanged:

$$J(T) = \frac{1}{2} \left\langle (T_0 - T) \otimes (T_0 - T), \int_{\mathcal{X}} \int_{\mathcal{Y}} C_{x,y} p_0(dx, dy) \right\rangle_{HS} = \frac{1}{2} \langle T_0 - T, C(T_0 - T) \rangle_{\mathcal{H}}$$

3. From (6) we have  $J(T) = \frac{1}{2} \langle T, CT \rangle_{\mathcal{H}} - \langle T, CT_0 \rangle_{\mathcal{H}} + \frac{1}{2} \langle T_0, CT_0 \rangle_{\mathcal{H}}$ . Recalling that:  $\partial_i T(x, y) = \langle T, \Gamma_x \partial_i k(y, \cdot) \rangle_{\mathcal{H}}$  for all  $i \in [d]$ , and using  $\partial_i T_0(x, y) = \partial_i \log p_0(y|x) - \partial_i \log q_0(y|x)$  one gets:

$$\begin{aligned} \langle T, CT_0 \rangle_{\mathcal{H}} &= \int_{\mathcal{X} \times \mathcal{Y}} \left[ \sum_{i=1}^d \partial_i T(x, y) \partial_i T_0(x, y) \right] p_0(dx, dy) \\ &= \int_{\mathcal{X} \times \mathcal{Y}} \left[ \sum_{i=1}^d \partial_i T(x, y) \partial_i \log p_0(y|x) \right] p_0(dx, dy) - \int_{\mathcal{X} \times \mathcal{Y}} \left[ \sum_{i=1}^d \partial_i T(x, y) \partial_i \log q_0(y|x) \right] p_0(dx, dy) \\ &\stackrel{(a)}{=} \int_{\mathcal{X}} p_0(dx) \int_{\partial \mathcal{Y}} p_0(y|x) \nabla_y T(x, y) \cdot d\vec{S} - \int_{\mathcal{X} \times \mathcal{Y}} \left[ \sum_{i=1}^d \partial_i^2 T(x, y) + \partial_i T(x, y) \partial_i \log q_0(y|x) \right] p_0(dx, dy). \end{aligned}$$

(a) is obtained using the first Green's identity, where  $\partial \mathcal{Y}$  is the boundary of  $\mathcal{Y}$  and  $d\vec{S}$  is the oriented surface element. The first term  $\int_{\mathcal{X}} \pi(dx) \int_{\partial \mathcal{Y}} p_0(y|x) \nabla_y T(x, y) \cdot d\vec{S}$  vanishes by Lemma 4, which relies on Assumption (D). The second term can be written as:  $\int_{\mathcal{X} \times \mathcal{Y}} \langle T, \xi_{x,y} \rangle_{\mathcal{H}} p_0(dx, dy)$ .

By Assumptions (E) and (F)  $\xi_{x,y}$  is Bochner  $p_0$ -integrable, therefore:

$$\int_{\mathcal{X} \times \mathcal{Y}} \langle T, \xi_{x,y} \rangle_{\mathcal{H}} p_0(dx, dy) = \left\langle T, \int_{\mathcal{X} \times \mathcal{Y}} \xi_{x,y} p_0(dx, dy) \right\rangle_{\mathcal{H}} = \langle T, \xi \rangle_{\mathcal{H}}.$$

Hence  $\langle T, CT_0 \rangle_{\mathcal{H}} = -\langle T, \xi \rangle_{\mathcal{H}}$  and  $\xi = -CT_0$ . Moreover, one can clearly see that:

$$\langle T_0, CT_0 \rangle_{\mathcal{H}} = \int_{\mathcal{X} \times \mathcal{Y}} \sum_{i=1}^d (\partial_i T_0(x, y))^2 p_0(dx, dy) = J(p_{T_0} \| q_0).$$

And the result follows.

4. For  $\lambda > 0$ ,  $(C + \lambda I)$  is invertible as  $C$  is a symmetric trace-class operator. Moreover,  $(C + \lambda I)^{\frac{1}{2}}$  is well defined and one can easily see that:

$$J_{\lambda}(T) = \frac{1}{2} \|(C + \lambda I)^{\frac{1}{2}} T + (C + \lambda I)^{-\frac{1}{2}} \xi\|_{\mathcal{H}}^2 - \frac{1}{2} \langle \xi, (C + \lambda I)^{-1} \xi \rangle_{\mathcal{H}} + c_0$$

with  $c_0 = J(p_{T_0} \| q_0)$ .  $J_{\lambda}(T)$  is minimized if and only if  $(C + \lambda I)^{\frac{1}{2}} T = (C + \lambda I)^{-\frac{1}{2}} \xi$  and therefore  $T = (C + \lambda I)^{-1} \xi$  is the unique minimizer of  $J_{\lambda}(T)$ .

□

## B.2 Estimator of $T_0$

Given samples  $(X_a, Y_a)_{a=1}^n$  drawn i.i.d. from  $p_0$  and  $\lambda > 0$ , we define the empirical score function as

$$\hat{J}(T) := \frac{1}{2} \langle T, \hat{C}T \rangle_{\mathcal{H}} + \langle T, \hat{\xi} \rangle_{\mathcal{H}} + J(p_{T_0} \| q_0).$$

where:

$$\begin{aligned} \hat{C} &:= \frac{1}{n} \sum_{a=1}^n \sum_{i=1}^d \Gamma_{X_a} \partial_i k(Y_a, \cdot) \otimes \Gamma_{X_a} \partial_i k(Y_a, \cdot) \\ \hat{\xi} &:= \frac{1}{n} \sum_{a=1}^n \sum_{i=1}^d \Gamma_{X_a} [\partial_i \log q_0(Y_a) \partial_i k(Y_a, \cdot) + \partial_i^2 k(Y_a, \cdot)]. \end{aligned}$$

are the empirical estimators of  $C$  and  $\xi$  respectively.

**Theorem 4 (Estimator of  $T_0$ ).** *For and any  $\lambda > 0$ , we have the following:*

1. The unique minimizer  $T_{\lambda, n}$  of  $\hat{J}_\lambda(T) := \hat{J}(T) + \frac{\lambda}{2} \|T\|_{\mathcal{H}}^2$  over  $\mathcal{H}$  exists and is given by

$$T_{\lambda, n} = -(\hat{C} + \lambda I)^{-1} \hat{\xi}.$$

2. Moreover,  $T_{\lambda, n}$  is of the form

$$T_{\lambda, n} = -\frac{1}{\lambda} \hat{\xi} + \sum_{b=1}^n \sum_{i=1}^d \beta_{(b-1)d+i} \Gamma_{X_b} \partial_i k(Y_b, \cdot),$$

where  $(\beta_b)$  are obtained by solving the following linear system:

$$(G + n\lambda I)\beta = \frac{h}{\lambda}$$

with:

$$(G)_{(a-1)d+i, (b-1)d+j} = \langle \Gamma_{X_a} \partial_i k(Y_a, \cdot), \Gamma_{X_b} \partial_j k(Y_b, \cdot) \rangle_{\mathcal{H}}.$$

and:

$$(h)_{(a-1)d+i} = \langle \hat{\xi}, \Gamma_{X_a} \partial_i k(Y_a, \cdot) \rangle_{\mathcal{H}}.$$

*Proof.* 1. The same proof as in Theorem 3 holds with  $C$  and  $\xi$  replaced by  $\hat{C}$  and  $\hat{\xi}$ .

2. We will use the general representer theorem stated in Lemma 6. We have that:

$$\begin{aligned} T_{\lambda, n} &= \operatorname{arginf}_{T \in \mathcal{H}} \frac{1}{2} \langle T \hat{C} T \rangle_{\mathcal{H}} + \langle T, \hat{\xi} \rangle_{\mathcal{H}} + \frac{\lambda}{2} \|T\|_{\mathcal{H}}^2 \\ &= \operatorname{arginf}_{T \in \mathcal{H}} \frac{1}{2} \sum_{a=1}^n \sum_{i=1}^d \langle T, \Gamma_{X_a} \partial_i k(Y_a, \cdot) \rangle_{\mathcal{H}}^2 + \langle T, \hat{\xi} \rangle_{\mathcal{H}} + \frac{\lambda}{2} \|T\|_{\mathcal{H}}^2 \\ &= \operatorname{arginf}_{T \in \mathcal{H}} V(\langle T, \phi_1 \rangle_{\mathcal{H}}, \dots, \langle T, \phi_{nd+1} \rangle_{\mathcal{H}}) + \frac{\lambda}{2} \|T\|_{\mathcal{H}}^2. \end{aligned}$$

Where  $V(\theta_1, \dots, \theta_{nd+1}) := \frac{1}{2n} \sum_{a=1}^n \sum_{i=1}^d \theta_{(a-1)d+i}^2 + \theta_{nd+1}$  is a convex differentiable function and  $\phi_{(a-1)d+i} := \Gamma_{X_a} \partial_i k(Y_a, \cdot)$  where  $a \in [n]$ ,  $i \in [d]$  and  $\phi_{nd+1} = \hat{\xi}$ . Therefore, it follows from Lemma 6 that:

$$T_{\lambda, n} = \delta \hat{\xi} + \sum_{a=1}^n \sum_{i=1}^d \beta_{(a-1)d+i} \phi_{(a-1)d+i}.$$

where  $\delta$  and  $\beta$  satisfy:

$$\lambda(\beta, \delta) + \nabla V(K(\beta, \delta)) = 0$$

$$\text{with } K = \begin{pmatrix} G & h \\ h^T & \|\hat{\xi}\|_{\mathcal{H}}^2 \end{pmatrix}.$$

The gradient  $\nabla V$  of  $V$  is given by  $\nabla V(z, t) = (\frac{1}{n}z, 1)$ . The above equation reduces then to  $\lambda\delta + 1 = 0$  and  $\lambda\beta + \frac{1}{n}G\beta + \frac{\delta}{n}h = 0$  which yields  $\delta = -\frac{1}{\lambda}$  and  $(\frac{1}{n}G + \lambda I)\beta = \frac{1}{n\lambda}h$ .

□

### B.3 Consistency and convergence

**Theorem 5 (Consistency and convergence rates for  $T_{\lambda,n}$ ).** *Let  $\gamma > 0$  be a positive number and define  $\alpha = \max(\frac{1}{2(\gamma+1)}, \frac{1}{4}) \in (\frac{1}{4}, \frac{1}{2})$ , under Assumptions (A) to (F):*

1. if  $T_0 \in \overline{\mathcal{R}(C)}$  then  $\|T_{n,\lambda} - T_0\| \rightarrow 0$  when  $\lambda\sqrt{n} \rightarrow \infty$ ,  $\lambda \rightarrow 0$  and  $n \rightarrow \infty$ .
2. if  $T_0 \in \mathcal{R}(C^\gamma)$  for some  $\gamma > 0$  then  $\|T_{n,\lambda} - T_0\| = \mathcal{O}_{p_0}(n^{-\frac{1}{2}+\alpha})$  for  $\lambda = n^{-\alpha}$

*Proof.* Recalling that  $T_{\lambda,n} = -(\hat{C} + \lambda I)^{-1}\hat{\xi}$  We consider the following decomposition:

$$\begin{aligned} T_{\lambda,n} - T_\lambda &= -(\hat{C} + \lambda I)^{-1}(\hat{\xi} + (\hat{C} + \lambda I)T_\lambda) \stackrel{(*)}{=} -(\hat{C} + \lambda I)^{-1}(\hat{\xi} + \hat{C}T_\lambda + C(T_0 - T_\lambda)) \\ &= (\hat{C} + \lambda I)^{-1}(C - \hat{C})(T_\lambda - T_0) - (\hat{C} + \lambda I)^{-1}(\hat{\xi} + \hat{C}T_0) \\ &= (\hat{C} + \lambda I)^{-1}(C - \hat{C})(T_\lambda - T_0) - (\hat{C} + \lambda I)^{-1}(\hat{\xi} - \xi) + (\hat{C} + \lambda I)^{-1}(C - \hat{C})T_0. \end{aligned}$$

We used the fact that  $\lambda T_\lambda = C(T_0 - T_\lambda)$  in (\*). Define now

$$\begin{aligned} S_1 &:= \|(\hat{C} + \lambda I)^{-1}(C - \hat{C})(T_\lambda - T_0)\|_{\mathcal{H}} \\ S_2 &:= \|(\hat{C} + \lambda I)^{-1}(\hat{\xi} - \xi)\|_{\mathcal{H}} \\ S_3 &:= \|(\hat{C} + \lambda I)^{-1}(C - \hat{C})T_0\|_{\mathcal{H}} \\ \mathcal{A}_0(\lambda) &:= \|T_{\lambda,n} - T_0\|_{\mathcal{H}}. \end{aligned}$$

it comes then:

$$\begin{aligned} \|T_\lambda - T_0\|_{\mathcal{H}} &\leq \|T_{\lambda,n} - T_\lambda\|_{\mathcal{H}} + \|T_\lambda - T_0\|_{\mathcal{H}} \\ &\leq S_1 + S_2 + S_3 + \mathcal{A}_0(\lambda), \end{aligned}$$

Using Lemma 10 we can bound  $S_1$ ,  $S_2$  and  $S_3$ . Note that  $C_{x,y}$  as defined in (7) is a positive, self-adjoint trace-class operator by Lemma 1, we therefore have:

$$\begin{aligned} \|C_{x,y}\|_{HS}^2 &= \sum_{i,j=1}^d \langle \Gamma_x \partial_i k(y, \cdot), \Gamma_x \partial_j k(y, \cdot) \rangle_{\mathcal{H}}^2 \leq \sum_{i,j=1}^d \|\Gamma_x \partial_i k(y, \cdot)\|_{\mathcal{H}}^2 \|\Gamma_x \partial_j k(y, \cdot)\|_{\mathcal{H}}^2 \\ &\leq \left( \sum_{i=1}^d \|\Gamma_x \partial_i k(y, \cdot)\|_{\mathcal{H}}^2 \right)^2 \leq d \sum_{i=1}^d \|\Gamma_x \partial_i k(y, \cdot)\|_{\mathcal{H}}^4 \leq d\kappa^4 \sum_{i=1}^d \|\partial_i k(y, \cdot)\|_{\mathcal{H}_y}^4. \end{aligned}$$

The last inequality is obtained using Assumption (E). Using now Assumption (F) for  $\epsilon = 2$  one can get:

$$\int_{\mathcal{X} \times \mathcal{Y}} \|C_{x,y}\|_{HS}^2 p_0(dx, dy) \leq d\kappa^4 \sum_{i=1}^d \int_{\mathcal{X} \times \mathcal{Y}} \|\partial_i k(y, \cdot)\|_{\mathcal{H}_y}^4 p_0(dx, dy) < +\infty.$$

Lemma 10 can then be applied to get the following inequalities:

$$\begin{aligned} S_1 &\leq \|(\hat{C} + \lambda I)^{-1}\| \| (C - \hat{C})(T_\lambda - T_0) \|_{\mathcal{H}} = \mathcal{O}_{p_0}\left(\frac{\mathcal{A}(\lambda)}{\lambda\sqrt{n}}\right) \\ S_3 &\leq \|(\hat{C} + \lambda I)^{-1}\| \| (C - \hat{C})T_0 \|_{\mathcal{H}} = \mathcal{O}_{p_0}\left(\frac{1}{\lambda\sqrt{n}}\right) \\ \| (C + \lambda I)^{-1} \| &\leq \frac{1}{\lambda} \end{aligned}$$

To bound  $S_2$  we need to show that  $\|\hat{\xi} - \xi\|_{\mathcal{H}} = \mathcal{O}_{p_0}(n^{-\frac{1}{2}})$ . The same argument as in Sriperumbudur et al., 2017 holds:

$$\begin{aligned} \mathbb{E}_{p_0} \|\hat{\xi} - \xi\|_{\mathcal{H}}^2 &= \frac{1}{n} \left( \int_{\mathcal{X} \times \mathcal{Y}} \|\xi_{x,y}\|_{\mathcal{H}}^2 p_0(dx, dy) - \|\xi\|^2 \right) \\ &\leq \frac{1}{n} \int_{\mathcal{X} \times \mathcal{Y}} \|\xi_{x,y}\|_{\mathcal{H}}^2 p_0(dx, dy) \end{aligned}$$

By Assumption (F) for  $\epsilon = 2$  we have that  $\int_{\mathcal{X} \times \mathcal{Y}} \|\xi_{x,y}\|_{\mathcal{H}}^2 p_0(dx, dy) < \infty$ . One can therefore apply Chebychev inequality to get the results. It comes that:

$$S_2 \leq \|(\hat{C} + \lambda I)^{-1}\| \|\hat{\xi} - \xi\|_{\mathcal{H}} = \mathcal{O}_{p_0}\left(\frac{1}{\lambda\sqrt{n}}\right)$$

Using the bounds on  $S_1$ ,  $S_2$  and  $S_3$  we get:

$$\|T_{\lambda,n} - T_0\|_{\mathcal{H}} = \mathcal{O}_{p_0}\left(\frac{1}{\lambda\sqrt{n}} + \frac{\mathcal{A}_0(\lambda)}{\lambda\sqrt{n}}\right) + \mathcal{A}_0(\lambda) \quad (9)$$

1. By Lemma 9 we have  $\mathcal{A}_0(\lambda) \rightarrow 0$  as  $\lambda \rightarrow 0$  if  $T_0 \in \overline{\mathcal{R}(C)}$ . Therefore it follows from (9) that  $\|T_{\lambda,n} - T_0\| \rightarrow 0$  as  $\lambda \rightarrow 0$ ,  $\lambda\sqrt{n} \rightarrow \infty$  and  $n \rightarrow \infty$ .
2. We have by Lemma 9 that if  $T_0 \in \mathcal{R}(C^\gamma)$  for  $\gamma > 0$  then:

$$\mathcal{A}_0(\lambda) \leq \max\{1, \|C\|^{\gamma-1}\} \|C^{-\gamma}T_0\|_{\mathcal{H}} \lambda^{\min\{1, \gamma\}}.$$

The result follows by choosing  $\lambda = n^{-\max\{\frac{1}{4}, \frac{1}{2(\gamma+1)}\}} = n^{-\alpha}$ .

□

We denote by  $KL(p_{T_0}||p_T)$  the expected  $KL$  divergence between  $p_{T_0}$  and  $p_T$  under the marginal  $p_0(x)$ .

**Theorem 6 (Consistency and convergence rates for  $p_{T_{\lambda,n}}$ ).** *Assuming Assumptions (A) to (F), and  $\|k\|_\infty := \sup_{y \in \mathcal{Y}} k(y, y) < \infty$  and that  $p_{T_0}(y|x)$  is supported on  $\mathcal{Y}$  for all  $x \in \mathcal{X}$  then the following holds:*

1.  $KL(p_{T_0}||p_{T_{\lambda,n}}) \rightarrow 0$  as  $\lambda\sqrt{n} \rightarrow \infty$ ,  $\lambda \rightarrow 0$  and  $n \rightarrow \infty$ .
2. If  $T_0 \in \mathcal{R}(C^\gamma)$  for some  $\gamma > 0$  then by defining  $\alpha = \max(\frac{1}{2(\gamma+1)}, \frac{1}{4}) \in (\frac{1}{4}, \frac{1}{2})$ , and choosing  $\lambda = n^{-\alpha}$  we have that  $KL(p_0||p_{T_{n,\lambda}}) = \mathcal{O}_{p_0}(n^{-1+2\alpha})$

*Proof.* By Lemma 8, we have that  $\mathcal{T} = \mathcal{H}$  and we can assume without loss of generality that  $T_0 \in \overline{\mathcal{R}(C)}$ . Using Lemma 7 (also see van der Vaart et al., 2008 Lemma 3.1), one can see that for a given  $x$ :

$$KL(p_{T_0}(Y|x)||p_{T_{\lambda,n}}(Y|x)) \leq \|T_0(x) - T_{\lambda,n}(x)\|_\infty^2 \exp\|T_0(x) - T_{\lambda,n}(x)\|_\infty (1 + \|T_0(x) - T_{\lambda,n}(x)\|_\infty) \quad (10)$$

Moreover, using Assumption (E) and the fact that  $\|k\|_\infty < \infty$  one can see that

$$\begin{aligned} |T_0(x, y) - T_{\lambda, n}(x, y)|_{\mathcal{H}_y} &= \langle T_0 - T_{\lambda, n}, \Gamma_x k(y, \cdot) \rangle_{\mathcal{H}} \\ &\leq \|T_0 - T_{\lambda, n}\|_{\mathcal{H}} \|\Gamma_x k(y, \cdot)\|_{\mathcal{H}} \end{aligned}$$

which gives after taking the supremum:

$$\|T_0(x) - T_{\lambda, n}(x)\|_{\infty} \leq \kappa \|k\|_{\infty} \|T_0 - T_{\lambda, n}\|_{\mathcal{H}} \quad (11)$$

for all  $x \in \mathcal{X}$ . Using (11) in (10) and taking the expectation with respect to  $x$ , one can conclude using Theorem 5.  $\square$

## C Auxiliary results

**Lemma 1.** *Under Assumptions (C), (E) and (F) we have that:*

1.  $C_{x, y}$  is a trace-class positive and symmetric operator for all  $(x, y) \in \mathcal{X} \times \mathcal{Y}$
2.  $C_{x, y}$  is Bochner-integrable for all  $(x, y) \in \mathcal{X} \times \mathcal{Y}$
3.  $C$  is a trace-class positive and symmetric operator

*Proof.* Recall that  $C = \int_{\mathcal{X} \times \mathcal{Y}} C_{x, y} p_0(dx, dy)$  where  $C_{x, y} = \sum_{i=1}^d \Gamma_x \partial_i k(y, \cdot) \otimes \Gamma_x \partial_i k(y, \cdot)$  is a positive self-adjoint operator. The trace norm of  $C_{x, y}$  satisfies:

$$\begin{aligned} \|C_{x, y}\|_1 &\leq \sum_{i=1}^d \|\Gamma_x \partial_i k(y, \cdot) \otimes \Gamma_x \partial_i k(y, \cdot)\|_1 \\ &= \sum_{i=1}^d \|\Gamma_x \partial_i k(y, \cdot)\|_{\mathcal{H}}^2 \leq \sum_{i=1}^d \|\Gamma_x\|_{Op}^2 \|\partial_i k(y, \cdot)\|_{\mathcal{H}_y}^2 \\ &\stackrel{(a)}{\leq} \kappa^2 \sum_{i=1}^d \|\partial_i k(y, \cdot)\|_{\mathcal{H}_y}^2 < \infty. \end{aligned}$$

(a) comes from Assumption (E). This implies that  $C_{x, y}$  is trace-class. Moreover, by Assumption (F) for  $\epsilon = 1$  :  $\|\partial_i k(y, \cdot)\|_{\mathcal{H}_y} \in L^{2\epsilon}(\mathcal{Y}, p_0)$  which leads to:

$$\int_{\mathcal{X} \times \mathcal{Y}} \|C_{x, y}\|_1 p_0(dx, dy) < \infty.$$

This means that  $C_{x, y}$  is  $p_0$ -integrable in the Bochner sense ( Retherford, 1978, Definition 1 and Theorem 2 ) and its integral  $C$  is trace-class with:

$$\|C\|_1 = \left\| \int_{\mathcal{X} \times \mathcal{Y}} C_{x, y} p_0(dx, dy) \right\|_1 \leq \int_{\mathcal{X} \times \mathcal{Y}} \|C_{x, y}\|_1 p_0(dx, dy) < \infty.$$

$\square$

**Lemma 2.** *Let  $\mathcal{X}$  be a topological space endowed with a probability distribution  $\mathbb{P}$ . Let  $B$  be a separable Banach space. Define  $R$  to be an  $B$ -valued measurable function on  $\mathcal{X}$  in the Bochner sense ( Retherford, 1978 Definition 1 ), satisfying  $\int_{\mathcal{X}} \|R(x)\|_B d\mathbb{P}(x) < \infty$ , then  $R$  is  $\mathbb{P}$ -integrable in the Bochner sense (Retherford, 1978 Definition 1, Theorem 6) and for any continuous linear operator  $T$  from  $B$  to another Banach space  $A$ , then  $TR$  is also  $\mathbb{P}$ -integrable in the Bochner sense and:*

$$\int_{\mathcal{X}} TR(x) d\mathbb{P}(x) = T \int_{\mathcal{X}} R(x) d\mathbb{P}(x)$$



For a proof of this result see Retherford, 1978, Definition 1, Theorem 6 and 7.

**Lemma 3 (RKHS of differentiable kernels (Steinwart et al., 2008 Chap 4.4, Corollary 4.36)).** *Let  $\mathcal{X} \in \mathbb{R}^d$  be an open subset,  $m \geq 0$ , and  $k$  be an  $m$ -times continuously differentiable kernel on  $\mathcal{X}$  with RKHS  $\mathcal{H}$ . Then every function  $f \in \mathcal{H}$  is  $m$ -times continuously differentiable, and for  $\alpha \in \mathbb{N}_0^d$  with  $|\alpha| \leq m$  we have:*

$$\begin{aligned} |\partial^\alpha f(x)| &\leq \|f\|_{\mathcal{H}}^2 (\partial^{\alpha,\alpha} k(x,x))^{\frac{1}{2}} \\ \partial^\alpha f(x) &= \langle f, \partial^\alpha k(x, \cdot) \rangle_{\mathcal{H}} \end{aligned}$$

A proof of this result can be found in Steinwart et al., 2008 (Chap 4.4, Corollary 4.36)

**Lemma 4.** *Under Assumptions (B) to (D) we have the following:*

$$\int_{\mathcal{X}} \pi(dx) \int_{\partial\mathcal{Y}} p_0(y|x) \nabla_y T(x,y) \cdot d\vec{S} = 0 \quad \forall T \in \mathcal{T}$$

where  $\partial\mathcal{Y}$  is the boundary of  $\mathcal{Y}$  and  $d\vec{S}$  is an oriented surface element of  $\partial\mathcal{Y}$ .

*Proof.* First let's prove that  $\|\nabla_y T(x,y)\| p_0(y|x) = o(\|y\|^{1-d})$  for all  $x \in \mathcal{X}$ . Where the norm used is the euclidian norm in  $\mathbb{R}^d$ . Using the reproducing property and Cauchy-Schwarz inequality one can see that:

$$\begin{aligned} \|\nabla_y T(x,y)\|^2 &= \sum_{i=1}^d (\partial_i T(x,y))^2 = \sum_{i=1}^d \langle T_x, \partial_i k(y, \cdot) \rangle^2 \\ &\leq \|T_x\|^2 \left( \sum_{i=1}^d \|\partial_i k(y, \cdot)\|^2 \right) \end{aligned}$$

By Assumption (D), one can see that  $\sqrt{\sum_{i=1}^d \|\partial_i k(y, \cdot)\|^2} p_0(y|x) = o(\|x\|^{1-d})$ , therefore it comes that  $\|\nabla_y T(x,y)\| p_0(y|x) = o(\|y\|^{1-d})$ . Using Lemma 5 one gets that  $\int_{\partial\mathcal{Y}} p_0(y|x) \nabla_y T(x,y) \cdot d\vec{S} = 0$  for all  $x \in \mathcal{X}$  which leads to the result. □

**Lemma 5.** *Let  $\Omega$  be an open set in  $\mathbb{R}^d$  with piece-wise smooth boundary  $\partial\Omega$ . Let  $u$  be a real valued function defined over  $\Omega$  and  $v : \mathbb{R}^d \rightarrow \mathbb{R}^d$  a vector valued function. We assume that  $u$  and  $v$  are measurable and that  $\|v(x)\| |u(x)| = o(\|x\|^{1-d})$ . Then the following surface integral is null:*

$$\int_{\partial\Omega} u(x)v(x) \cdot d\vec{S} = 0$$

where  $d\vec{S}$  is an element of the surface  $\partial\Omega$ .

More details on this result can be found in Pietzsch, 1994

**Lemma 6 (Generalized representer theorem).** *Let  $\mathcal{H}$  be a vector-valued Hilbert space and let  $(\phi_i)_{i=1}^m \in \mathcal{H}^m$ . Suppose  $J : \mathcal{H} \rightarrow \mathbb{R}$  is such that  $J(T) = V(\langle T, \phi_1 \rangle_{\mathcal{H}}, \dots, \langle T, \phi_m \rangle_{\mathcal{H}})$  for  $T \in \mathcal{H}$ , where  $V : \mathbb{R}^m \rightarrow \mathbb{R}$  is a convex and gâteaux-differentiable function. Define:*

$$T_\lambda = \operatorname{arginf}_{T \in \mathcal{H}} J(T) + \frac{\lambda}{2} \|T\|_{\mathcal{H}}^2$$

where  $\lambda > 0$ . Then there exists  $(\alpha_i)_{i=1}^m \in \mathbb{R}^m$  such that  $T_\lambda = \sum_{i=1}^m \alpha_i \phi_i$  where  $\alpha := (\alpha_1, \dots, \alpha_m)$  satisfies the following equation:

$$(\lambda I + (\nabla V) \circ K) \alpha = 0,$$

with  $(K)_{i,j} = \langle \phi_i, \phi_j \rangle_{\mathcal{H}}$ ,  $\mathbb{B} \in [m], j \in [m]$

*Proof.* Define  $A : \mathcal{H} \rightarrow \mathbb{R}^m$ ,  $T \mapsto (\langle T, \phi_i \rangle_{\mathcal{H}})_{i=1}^m$ . Then  $T_\lambda = \operatorname{arginf}_{T \in \mathcal{H}} V(AT) + \frac{\lambda}{2} \|T\|_{\mathcal{H}}^2$ . Taking the gâteaux-differential at  $T$ , the optimality condition yields:

$$\begin{aligned} 0 = A^* \nabla V(AT_\lambda) + \lambda T_\lambda &\Leftrightarrow A^* \left( -\frac{1}{\lambda} \nabla V(AT_\lambda) \right) = T_\lambda \\ &\Leftrightarrow (\exists \alpha \in \mathbb{R}^m) T_\lambda = A^* \alpha, \alpha = -\frac{1}{\lambda} \nabla V(AT_\lambda) \\ &\Leftrightarrow (\exists \alpha \in \mathbb{R}^m) T_\lambda = A^* \alpha, \alpha = -\frac{1}{\lambda} \nabla V(AA^* \alpha) \end{aligned}$$

where  $A^* : \mathbb{R}^m \rightarrow \mathcal{H}$  is the adjoint of  $A$  which can be obtained as follows. Note that:

$$(\forall T \in \mathcal{H}) (\forall \alpha \in \mathbb{R}^m) \quad \langle AT, \alpha \rangle = \sum_{i=1}^m \alpha_i \langle T, \phi_i \rangle_{\mathcal{H}} = \left\langle T, \sum_{i=1}^m \alpha_i \phi_i \right\rangle_{\mathcal{H}}$$

thus  $A^* \alpha = \sum_{i=1}^m \alpha_i \phi_i$ . Therefore  $AA^* \alpha = \sum_{i=1}^m \alpha_j A \phi_j = \sum_{j=1}^m \alpha_j (\langle \phi_j, \phi_i \rangle_{\mathcal{H}})$  and hence  $AA^* = K$ .  $\square$

**Lemma 7** (Bound on KL divergence between  $p_f$  and  $p_g$  (van der Vaart et al., 2008 Lemma 3.1)). Assume that  $\|k\|_\infty < \infty$  and let  $f$  and  $g$  in  $\mathcal{H}_{\mathcal{Y}}$  such that  $Z(f)$  and  $Z(g)$  are finite, then:  $KL(p_f \| q_g) \leq \|f - g\|_\infty^2 \exp \|f - g\|_\infty (1 + \|f - g\|_\infty)$

**Lemma 8** (see Lemma 14 in Sriperumbudur et al., 2017). Suppose  $\sup_{y \in \mathcal{Y}} k(y, y) < \infty$  and  $\operatorname{supp}(q_0) = \mathcal{Y}$ . Then  $\mathcal{T} = \mathcal{H}$  and for any  $T_0$  there exists  $\tilde{T}_0 \in \overline{\mathcal{R}(C)}$  such that  $p_{\tilde{T}_0} = p_0$ .

*Proof.* Since  $\|k\|_\infty < \infty$  then  $Z(T_x) \leq \exp \|T_x\| \|k\|_\infty < \infty$  for all  $T \in \mathcal{H}$ , therefore  $\mathcal{T} = \mathcal{H}$ . Moreover, since  $\operatorname{supp}(p_{T_0})(y|x) = \mathcal{Y}$  for all  $x$  in  $\mathcal{X}$ , this implies that the null space of  $C \mathcal{N}(C)$  can either be the set of functions  $T(x, y) = m(x)$  or  $\{0\}$ . Indeed, for  $T \in \mathcal{N}(C)$  we have  $\langle T, CT \rangle = 0$  which leads to  $\int_{\mathcal{X} \times \mathcal{Y}} \|\nabla_y T\|_2^2 p_0(dx, dy) = 0$  which means that  $p_0$ -almost surely,  $T_x(y) = m(x)$  a constant function of  $y$  if the set of constant functions belong to  $\mathcal{H}_{\mathcal{Y}}$ , or  $T_x(y) = 0$  otherwise. Let  $\tilde{T}_0$  be the orthogonal projection of  $T_0$  onto  $\overline{\mathcal{R}(C)} = \mathcal{N}(C)^\perp$  then  $T_0$  can be written in the form  $T_0(x, y) = m(x) + \tilde{T}_0(x, y)$ . It comes that  $\int_{\mathcal{Y}} \exp T_0(x, y) q_0(dy) = \exp m(x) \int_{\mathcal{Y}} \exp \tilde{T}_0(x, y) q_0(dy)$  almost surely in  $x$ . And we finally get  $p_0$ -almost surely:

$$p_{T_0}(y|x) = \frac{\exp T_0(x, y)}{Z(T_0(x))} = \frac{\exp T_0(x, y) + m(x)}{\exp m(x) Z(T_0(x))} = p_{\tilde{T}_0}(y|x)$$

$\square$

**Lemma 9** (Proposition A.3 in Sriperumbudur et al., 2017). Let  $C$  be a bounded, positive self-adjoint compact operator on a separable Hilbert space  $\mathcal{H}$ . For  $\lambda > 0$  and  $T \in \mathcal{H}$ , define  $T_\lambda := (C + \lambda I)^{-1} CT$  and  $\mathcal{A}_\theta(\lambda) := \|C^\theta (T_\lambda - T)\|_{\mathcal{H}}$  for  $\theta \geq 0$ . Then the following hold.

1. For any  $\theta > 0$ ,  $\mathcal{A}_\theta(\lambda) \rightarrow 0$  as  $\lambda \rightarrow 0$  and if  $T \in \overline{\mathcal{R}(C)}$ , then  $\mathcal{A}_0(\lambda) \rightarrow 0$  as  $\lambda \rightarrow 0$ .
2. If  $T \in \mathcal{R}(C^\beta)$  for  $\beta \geq 0$  and  $\beta + \theta > 0$ , then

$$\mathcal{A}_\theta(\lambda) \leq \max\{1, \|C\|^{\beta+\theta-1}\} \lambda^{\min\{1, \beta+\theta\}} \|C^{-\beta} T\|_{\mathcal{H}}$$

*Proof.* 1. Since  $C$  is bounded, compact and positive self-adjoint, Hilbert-Schmidt and  $\mathcal{H}$  is a separable Hilbert space then  $C$  admits an Eigen-decomposition of the form  $C = \sum_l \alpha_l \phi_l \langle \phi_l, \cdot \rangle_{\mathcal{H}}$  where  $(\alpha_l)_{l \in \mathbb{N}}$  are positive eigenvalues and  $(\phi_l)_{l \in \mathbb{N}}$  are the corresponding unit eigenvectors that form an ONB for  $\mathcal{R}(C)$ . Let  $\theta = 0$ . Since  $T \in \overline{\mathcal{R}(C)}$ ,

$$\begin{aligned} \mathcal{A}_0^2(\lambda) &= \|(C + \lambda I)^{-1} CT - T\|_{\mathcal{H}}^2 = \left\| \sum_i \frac{\alpha_i}{\alpha_i + \lambda} \langle T, \phi_i \rangle_{\mathcal{H}} \phi_i - \sum_i \langle T, \phi_i \rangle_{\mathcal{H}} \phi_i \right\|_{\mathcal{H}}^2 \\ &= \left\| \sum_i \frac{\lambda}{\alpha_i + \lambda} \langle T, \phi_i \rangle_{\mathcal{H}} \phi_i \right\|_{\mathcal{H}}^2 = \sum_i \left( \frac{\lambda}{\alpha_i + \lambda} \right)^2 \langle T, \phi_i \rangle_{\mathcal{H}}^2 \rightarrow 0 \text{ as } \lambda \rightarrow 0 \end{aligned}$$

by the dominated convergence theorem. For any  $\theta > 0$ , we have:

$$\mathcal{A}_0^2(\lambda) = \|C^\theta(C + \lambda I)^{-1}CT - C^\theta T\|_{\mathcal{H}}^2 = \left\| \sum_i \frac{\alpha_i}{\alpha_i + \lambda} \langle T, \phi_i \rangle_{\mathcal{H}} \phi_i - \sum_i \langle T, \phi_i \rangle_{\mathcal{H}} \phi_i \right\|_{\mathcal{H}}^2.$$

Let  $T = T_R + T_N$  where  $T_R \in \overline{\mathcal{R}(C^\theta)}$ ,  $T_N \in \overline{\mathcal{R}(C^\theta)}^\perp$  if  $0 < \theta \leq 1$  and  $T_N \in \overline{\mathcal{R}(C)}^\perp$  if  $\theta \geq 1$ . Then

$$\begin{aligned} \mathcal{A}_0^2(\lambda) &= \|C^\theta(C + \lambda I)^{-1}CT - C^\theta T\|_{\mathcal{H}}^2 = \|C^\theta(C + \lambda I)^{-1}CT_R - C^\theta T_R\|_{\mathcal{H}}^2 \\ &= \left\| \sum_i \frac{\alpha_i^{1+\theta}}{\alpha_i + \lambda} \langle T_R, \phi_i \rangle_{\mathcal{H}} \phi_i - \sum_i \alpha_i^\theta \langle T_R, \phi_i \rangle_{\mathcal{H}} \phi_i \right\|_{\mathcal{H}}^2 \\ &= \left\| \sum_i \frac{\lambda \alpha_i^\theta}{\alpha_i + \lambda} \langle T_R, \phi_i \rangle_{\mathcal{H}} \phi_i \right\|_{\mathcal{H}}^2 = \sum_i \left( \frac{\lambda \alpha_i^\theta}{\alpha_i + \lambda} \right)^2 \langle T_R, \phi_i \rangle_{\mathcal{H}}^2 \rightarrow 0 \text{ as } \lambda \rightarrow 0 \end{aligned}$$

2. If  $T \in \mathcal{R}(C^\beta)$ , then there exists  $g \in \mathcal{H}$  such that  $T = C^\beta g$ . This yields

$$\begin{aligned} \mathcal{A}_0^2(\lambda) &= \|C^\theta(C + \lambda I)^{-1}CT - C^\theta T\|_{\mathcal{H}}^2 = \|C^\theta(C + \lambda I)^{-1}C^{1+\beta}g - C^{\beta+\theta}g\|_{\mathcal{H}}^2 \\ &= \left\| \sum_i \frac{\lambda \alpha_i^{\beta+\theta}}{\alpha_i + \lambda} \langle g, \phi_i \rangle_{\mathcal{H}} \phi_i \right\|_{\mathcal{H}}^2 = \sum_i \left( \frac{\lambda \alpha_i^{\beta+\theta}}{\alpha_i + \lambda} \right)^2 \langle g, \phi_i \rangle_{\mathcal{H}}^2 \end{aligned}$$

Suppose  $0 < \beta + \theta < 1$ . Then

$$\frac{\lambda \alpha_i^{\beta+\theta}}{\alpha_i + \lambda} = \left( \frac{\alpha_i}{\alpha_i + \lambda} \right)^{\beta+\theta} \left( \frac{\lambda}{\alpha_i + \lambda} \right)^{1-\beta-\theta} \lambda^{\beta+\theta} \leq \lambda^{\beta+\theta}$$

On the other hand, for  $\beta + \theta \geq 1$ , we have:

$$\frac{\lambda \alpha_i^{\beta+\theta}}{\alpha_i + \lambda} = \left( \frac{\alpha_i}{\alpha_i + \lambda} \right) \alpha_i^{\beta+\theta-1} \lambda \leq \|\alpha_i^{\beta+\theta-1}\| \lambda.$$

Using the above bounds yields the result.  $\square$

**Lemma 10** (Proposition A.4 in Sriperumbudur et al., 2017). *Let  $\mathcal{X}$  be a topological space,  $\mathcal{H}$  be a separable Hilbert space and  $\mathcal{L}_2^+(\mathcal{H})$  be the space of positive, self-adjoint Hilbert-Schmidt operators on  $\mathcal{H}$ . Define  $R := \int_{\mathcal{X}} r(x) d\mathbb{P}(x)$  and  $\hat{R} := \frac{1}{n} \sum_{a=1}^n r(X_a)$  where  $\mathbb{P} \in M_+^1(\mathcal{X})$  is a positive measure with finite mean,  $(X_a)_{a=1}^n \sim \mathbb{P}$  and  $r$  is an  $\mathcal{L}_2^+(\mathcal{H})$ -valued measurable function on  $\mathcal{X}$  satisfying  $\int_{\mathcal{X}} \|r(x)\|_{HS}^2 d\mathbb{P}(x) < \infty$ . Define  $g_\lambda := (R + \lambda I)^{-1}Rg$  for  $g \in \mathcal{H}$ ,  $\lambda > 0$  and  $\mathcal{A}_0(\lambda) := \|g_\lambda - g\|_{\mathcal{H}}$ . Let  $\alpha \geq 0$  and  $\theta \geq 0$ . Then the following hold:*

1.  $\|(\hat{R} - R)(g_\lambda - g)\|_{\mathcal{H}} = O_{\mathbb{P}}\left(\frac{\mathcal{A}_0(\lambda)}{\sqrt{m}}\right)$
2.  $\|R^\alpha(R + \lambda I)^{-\theta}\| \leq \lambda^{\alpha-\theta}$ .
3.  $\|\hat{R}^\alpha(\hat{R} + \lambda I)^{-\theta}\| \leq \lambda^{\alpha-\theta}$ .
4.  $\|(R + \lambda I)^{-\theta}(\hat{R} - R)\| = O_{\mathbb{P}}\left(\frac{1}{\sqrt{m\lambda^{2\theta}}}\right)$ .

*Proof.* 1. Note that for any  $f \in \mathcal{H}$ ,

$$\mathbb{E}_{\mathbb{P}}\|(\hat{R} - R)f\|_{\mathcal{H}}^2 = \mathbb{E}_{\mathbb{P}}\|\hat{R}f\|_{\mathcal{H}}^2 + \|Rf\|_{\mathcal{H}}^2 - 2\mathbb{E}_{\mathbb{P}}\langle \hat{R}f, Rf \rangle_{\mathcal{H}}$$

where  $\mathbb{E}_{\mathbb{P}}\langle \hat{R}f, Rf \rangle_{\mathcal{H}} = \frac{1}{n} \sum_{a=1}^n \mathbb{E}_{\mathbb{P}}\langle r(X_a)f, Rf \rangle_{\mathcal{H}} = \frac{1}{n} \sum_{a=1}^n \mathbb{E}_{\mathbb{P}}\langle r(X_a), f \otimes Rf \rangle_{HS}$ . Since  $\int_{\mathcal{X}} \|r(x)\|_{HS}^2 d\mathbb{P}(x) < \infty$ ,  $r(x)$  is  $\mathbb{P}$ -integrable in the Bochner sense (see Retherford, 1978), and therefore it follows  $\mathbb{E}_{\mathbb{P}}\langle r(X_a), f \otimes Rf \rangle_{HS} = \langle \int_{\mathcal{X}} r(x) d\mathbb{P}(x), f \otimes Rf \rangle_{HS} = \|Rf\|_{HS}^2$ . Therefore,

$$\mathbb{E}_{\mathbb{P}}\|(\hat{R} - R)f\|_{\mathcal{H}}^2 = \mathbb{E}_{\mathbb{P}}\|\hat{R}f\|_{\mathcal{H}}^2 - \|Rf\|_{\mathcal{H}}^2$$

where

$$\mathbb{E}_{\mathbb{P}} \left\| \frac{1}{m} \sum_{a=1}^m r(X_a) f \right\|_{\mathcal{H}}^2 = \frac{1}{m^2} \sum_{a,b=1}^m \mathbb{E}_{\mathbb{P}} \langle r(X_a) f, r(X_b) f \rangle_{\mathcal{H}}.$$

Splitting the sum into two parts (one with  $a = b$  and the other with  $a \neq b$ ), it is easy to verify that  $\mathbb{E}_{\mathbb{P}} \|\hat{R}f\|_{\mathcal{H}}^2 = \frac{1}{m} \int_{\mathcal{X}} \|r(x)f\|_{\mathcal{H}}^2 d\mathbb{P}(x) + \frac{m-1}{m} \|Rf\|_{\mathcal{H}}^2$ , therefore yielding

$$\begin{aligned} \mathbb{E}_{\mathbb{P}} \|(\hat{R} - R)f\|_{\mathcal{H}}^2 &= \frac{1}{m} \left( \int_{\mathcal{X}} \|r(x)f\|_{\mathcal{H}}^2 d\mathbb{P}(x) - \|Rf\|_{\mathcal{H}}^2 \right) \leq \frac{1}{m} \int_{\mathcal{X}} \|r(x)f\|_{\mathcal{H}}^2 d\mathbb{P}(x) \\ &\leq \frac{\|f\|_{\mathcal{H}}^2}{m} \int_{\mathcal{X}} \|r(x)\|_{HS}^2 d\mathbb{P}(x) \end{aligned}$$

Using  $f = g_{\lambda} - g$ , an application of Chebyshev's inequality yields the result.

2.  $\|R^{\alpha}(R + \lambda I)^{-\theta}\| = \sup_i \frac{\gamma_i^{\alpha}}{(\gamma_i + \lambda)^{\theta}} = \sup_i \left[ \left( \frac{\gamma_i}{\gamma_i + \lambda} \right)^{\alpha} \frac{1}{(\gamma_i + \lambda)^{\theta - \alpha}} \right] \leq \sup_i \frac{1}{(\gamma_i + \lambda)^{\theta - \alpha}} \leq \lambda^{\alpha - \theta}$ , where  $(\gamma_i)_{i \in \mathbb{N}}$  are the eigenvalues of  $R$ .
3. Same as above, after replacing  $(\gamma_i)_{i \in \mathbb{N}}$  by the eigenvalues of  $\hat{R}$ .
4. Since  $\|(R + \lambda I)^{-\theta}(\hat{R} - R)\| \leq \|(R + \lambda I)^{-\theta}(\hat{R} - R)\|_{HS}^2$ , consider  $\mathbb{E}_{\mathbb{P}} \|(R + \lambda I)^{-\theta}(\hat{R} - R)\|_{HS}^2$ , which using the technique in the proof of (1), can be shown to be bounded as

$$\mathbb{E}_{\mathbb{P}} \|(R + \lambda I)^{-\theta}(\hat{R} - R)\|_{HS}^2 \leq \frac{1}{m} \int_{\mathcal{X}} \|(R + \lambda I)^{-\theta} r(x)\|_{HS}^2 d\mathbb{P}(x) \quad (12)$$

Note that

$$\begin{aligned} \|(R + \lambda I)^{-\theta} r(x)\|_{HS}^2 &= \langle (R + \lambda I)^{-\theta} r(x), (R + \lambda I)^{-\theta} r(x) \rangle_{HS} \\ &= \|(R + \lambda I)^{-2\theta} \text{Tr}(r(x)r(x))\| = \|(R + \lambda I)^{-2\theta}\| \|r(x)\|_{HS}^2 \\ &\leq \lambda^{-2\theta} \|r(x)\|_{HS}^2 \end{aligned} \quad (13)$$

where the inequality follows from (3). Using (12) and (13), we obtain

$$\mathbb{E}_{\mathbb{P}} \|(R + \lambda I)^{-\theta} r(x)\|_{HS}^2 \leq \frac{1}{m\lambda^{2\theta}} \int_{\mathcal{X}} \|(R + \lambda I)^{-\theta} r(x)\|_{HS}^2 d\mathbb{P}(x)$$

The result follows by an application of Chebyshev's inequality.  $\square$

## D Failure case for the score-matching approach

We first recall the expressions of the score and expected conditional score for convenience. If  $r$  and  $s$  are two densities that are differentiable and positive, then the score objective as introduced in Hyvärinen et al., 2005 is given by:

$$\mathcal{J}(r||s) := \frac{1}{2} \int_{\mathcal{X}} r(x) \|\nabla_x \log r(x) - \nabla_x \log s(x)\|^2 dx \quad (14)$$

If  $p_0(y|x)$  and  $q(y|x)$  are two conditional densities, then the expected conditional score under some marginal distribution  $\pi(x)$  is given by:

$$J(p_0|q) = \int_{\mathcal{X}} \mathcal{J}(p_0(\cdot|x)q(\cdot|x))\pi(x)dx \quad (15)$$

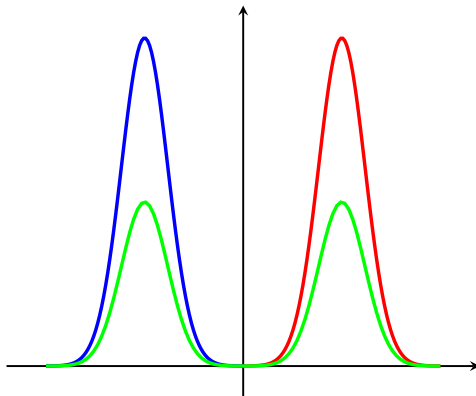

Figure 3: A Failure case for the expected conditional score-matching. Here a conditional density of the form  $p_0(y|x) = p_A(y)H(x) + (1 - H(x))p_B(y)$  is considered, where  $p_A$  and  $p_B$  are supported on two disjoint sets  $A \subset \mathbb{R}_+^*$  and  $B \subset \mathbb{R}_+^*$  and  $H$  denotes the Heaviside step function. The red curve and blue curve represent  $p_0(y|x > 0) = p_A$  and  $p_0(y|x \leq 0) = p_B$  respectively, while the green curve represent the mixture  $q(y) = \frac{1}{2}(p_A(y) + p_B(y))$ . This is a case where the expected conditional score fails to separate the two conditional distributions  $p_0(y|x)$  and  $q(y)$ .

The positivity condition of the target density  $r$  is crucial to get a well-behaved divergence between  $r$  and  $s$  in (14). When this condition fails, the score becomes degenerate. For instance, if  $r$  is supported on two disjoint sets  $A$  and  $B$  of  $\mathcal{X}$  it can be written in the form:

$$r(x) = \alpha_A p_A(x) + \alpha_B p_B(x)$$

where  $\alpha_A$  and  $\alpha_B$  are non-negative and sum to 1, and  $p_A$  and  $p_B$  are two distributions supported on  $A$  and  $B$  respectively. In this case, any mixture  $s(x) = \beta_A p_A(x) + \beta_B p_B(x)$  satisfies  $J(r||s) = 0$ .

Similarly, for the conditional expected score in (15) to be well behaved, the conditional density  $p_0(y|x)$  needs to be positive on  $\mathcal{Y}$  for all  $x$  in  $\mathcal{X}$ . When this condition fails to hold, the same degeneracy happens. Indeed, as shown in Figure 3, consider  $p_0$  of the form:

$$p_0(y|x) = p_A(y)H(x) + (1 - H(x))p_B(y)$$

where  $p_A$  and  $p_B$  are supported on two disjoint sets  $A$  and  $B$  respectively and  $H$  denotes the Heaviside step function. For this choice of  $p_0$  any mixture  $q(y) = \beta_A p_A(y) + \beta_B p_B(y)$  of  $p_A$  and  $p_B$  satisfies  $J(p_0||q) = 0$ . This is because their scores match exactly:  $\nabla_y \log p_0(y|x) = \nabla_y \log q(y)$  whenever  $p_0(y|x) > 0$ . Note that in this case  $q$  doesn't depend on  $x$ , which means that this approach might learn a model where  $x$  and  $y$  are independent while a simple investigation of the joint samples  $(X_i, Y_i)$  would suggest the opposite.

## E Additional experimental results

Additional experimental results are shown in Figure 4 on the Red Wine and Parkinsons datasets.

Experimental results on the synthetic grid dataset are shown in Figure 5 in the case where an isotropic RBF kernel is used.

## References

- Hyvärinen, Aapo and Peter Dayan (2005). “Estimation of non-normalized statistical models by score matching.” In: *Journal of Machine Learning Research* 6, pp. 695–709.
- Pietzsch, W. (1994). “D. E. Bourne. P. C. Kendall. Vector analysis and cartesian tensors. Third edition Chapman and Hall. London-Glasgow-New York-Tokyo-Melbourne-Madras 1992, Seitenzahl: 304, Zahl der Abbildungen und Tabellen: 115. ISBN: 0-412-42750-8.” In: *Crystal Research and Technology* 29.1, pp. 50–50. URL: <http://dx.doi.org/10.1002/crat.2170290115>.

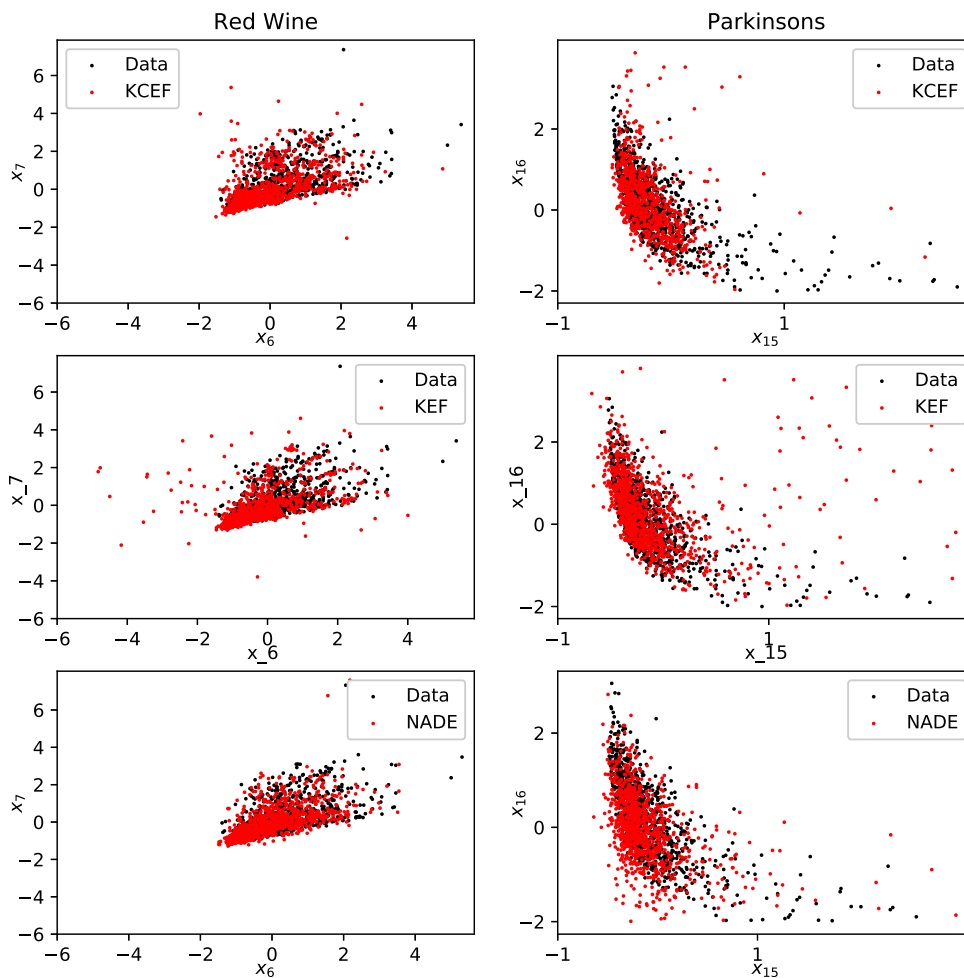

Figure 4: Scatter plot of 2-d slices of *red wine* and *parkinsons* data sets, the dimensions are  $(x_6, x_7)$  for *red wine* and  $(x_{15}, x_{16})$  for *parkinsons*. The black points represent 1000 data points from the data sets. In red, 1000 samples from each of the three models KEF, KCEF and NADE.

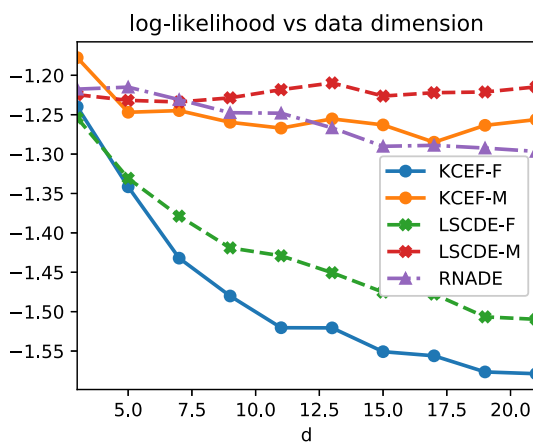

Figure 5: Experimental comparison of proposed method KCEF and other methods ( LSCDE and NADE ) on synthetic *grid* dataset. log-likelihood per dimension vs dimension,  $N = 2000$ . The log-likelihood is evaluated on a separate test set of size 2000.

- Retherford, J. R. (1978). “Review: J. Diestel and J. J. Uhl, Jr., Vector measures.” In: *Bull. Amer. Math. Soc.* 84.4, pp. 681–685. URL: <http://projecteuclid.org/euclid.bams/1183540941>.
- Sriperumbudur, Bharath, Kenji Fukumizu, Arthur Gretton, Aapo Hyvärinen, and Revant Kumar (2017). “Density Estimation in Infinite Dimensional Exponential Families.” In: *Journal of Machine Learning Research* 18.57, pp. 1–59. URL: <http://jmlr.org/papers/v18/16-011.html>.
- Steinwart, Ingo and Andreas Christmann (2008). *Support Vector Machines*. 1st. Springer Publishing Company, Incorporated.
- van der Vaart, A. W. and J. H. van Zanten (2008). “Rates of contraction of posterior distributions based on Gaussian process priors.” In: eprint: 0806.3024. URL: <https://arxiv.org/abs/0806.3024>.
